# Supplementary material
Source: PubMed Central journal article supplement (PMC3326345)
Supplement: NIHMS348833-supplement-1_si_001.pdf [file NIHMS348833-supplement-1_si_001.pdf]

## Supporting Information

### Processive Carbohydrate Polymerases Mediate Bifunctional Catalysis Using a Single Active Site

John F. May, Matthew R. Levengood, Rebecca A. Splain, & Laura L. Kiessling

**Table S1** GlfT2 homologs used in the multiple sequence alignment.

| Abbreviation | GenBank Accession Number or NCBI Reference Sequence | Source of sequence (bacterial species)                  |
|--------------|-----------------------------------------------------|---------------------------------------------------------|
| Nbr          | BAF46769.1                                          | <i>Nocardia brasiliensis</i>                            |
| Nf1          | YP_116420.1                                         | <i>Nocardia farcinica</i> IFM 10152                     |
| Rr1          | YP_704064.1                                         | <i>Rhodococcus</i> sp. RHA1                             |
| Ser          | YP_001107843.1                                      | <i>Saccharopolyspora erythraea</i> NRRL 2338            |
| Bde          | ZP_02917795.1                                       | <i>Bifidobacterium dentium</i> ATCC 27678               |
| Ban          | ZP_02964173.1                                       | <i>Bifidobacterium animalis</i> subsp. lactis HN019     |
| Bll          | NP_695433.1                                         | <i>Bifidobacterium longum</i> NCC2705                   |
| <b>Mth</b>   | <b>NP_218325.1</b>                                  | <b><i>Mycobacterium tuberculosis</i> H37Rv</b>          |
| Mtc          | NP_338467.1                                         | <i>Mycobacterium tuberculosis</i> CDC1551               |
| Mma          | YP_001853631.1                                      | <i>Mycobacterium marinum</i> M                          |
| Mul          | YP_908340.1                                         | <i>Mycobacterium ulcerans</i> Agy99                     |
| Mle          | NP_301191.1                                         | <i>Mycobacterium leprae</i> TN                          |
| Mav          | YP_879503.1                                         | <i>Mycobacterium avium</i> 104                          |
| Map          | NP_959146.1                                         | <i>Mycobacterium avium</i> subsp. paratuberculosis K-10 |
| Mjl          | YP_001073654.1                                      | <i>Mycobacterium</i> sp. JLS                            |
| Mmc          | YP_642179.1                                         | <i>Mycobacterium</i> sp. MCS                            |
| Mva          | YP_956420.1                                         | <i>Mycobacterium vanbaalenii</i> PYR-1                  |
| Mgi          | YP_001132430.1                                      | <i>Mycobacterium gilvum</i> PYR-GCK                     |
| Msm          | YP_890616.1                                         | <i>Mycobacterium smegmatis</i> str. MC2 155             |
| Mab          | YP_001700925.1                                      | <i>Mycobacterium abscessus</i>                          |
| Rr2          | YP_704009.1                                         | <i>Rhodococcus</i> sp. RHA1                             |
| Nf2          | YP_116383.1                                         | <i>Nocardia farcinica</i> IFM 10152                     |
| Cur          | YP_001799546.1                                      | <i>Corynebacterium urealyticum</i> DSM 7109             |
| Cje          | YP_249900.1                                         | <i>Corynebacterium jeikeium</i> K411                    |
| Cg1          | NP_602073.1                                         | <i>Corynebacterium glutamicum</i> ATCC 13032            |
| Cg2          | YP_227122.1                                         | <i>Corynebacterium glutamicum</i> ATCC 13032            |
| Cg3          | BAC00276.1                                          | <i>Corynebacterium glutamicum</i> ATCC 13032            |
| Cgr          | YP_001139691.1                                      | <i>Corynebacterium glutamicum</i> R                     |
| Cef          | NP_739324.1                                         | <i>Corynebacterium efficiens</i> YS-314                 |
| Cdi          | NP_940506.1                                         | <i>Corynebacterium diphtheriae</i> NCTC 13129           |
| Se1          | YP_001107844.1                                      | <i>Saccharopolyspora erythraea</i> NRRL 2338            |

|     |                |                                                                                       |
|-----|----------------|---------------------------------------------------------------------------------------|
| Se2 | YP_001102444.1 | <i>Saccharopolyspora erythraea</i> NRRL 2338                                          |
| Rsa | YP_001624767.1 | <i>Renibacterium salmoninarum</i> ATCC 33209                                          |
| Afb | YP_832172.1    | <i>Arthrobacter</i> sp. FB24                                                          |
| Aau | YP_948391.1    | <i>Arthrobacter aureescens</i> TC1                                                    |
| Kra | YP_001363614.1 | <i>Kineococcus radiotolerans</i> SRS30216                                             |
| Krh | YP_001854751.1 | <i>Kocuria rhizophila</i> DC2201                                                      |
| Njs | YP_922603.1    | <i>Nocardioides</i> sp. JS614                                                         |
| Cms | YP_001709406.1 | <i>Clavibacter michiganensis</i> subsp. <i>Sepedonicus</i>                            |
| Cmm | YP_001221762.1 | <i>Clavibacter michiganensis</i> subsp. <i>michiganensis</i> NCPPB 382                |
| Bl2 | NP_695432.1    | <i>Bifidobacterium longum</i> NCC2705                                                 |
| Sen | ZP_02701557.1  | <i>Salmonella enterica</i> subsp. <i>enterica</i> serovar Newport str. SL317          |
| Seh | ZP_02665507.1  | <i>Salmonella enterica</i> subsp. <i>enterica</i> serovar Heidelberg str. SL486       |
| Sew | ZP_02832148.1  | <i>Salmonella enterica</i> subsp. <i>enterica</i> serovar Weltevreden str. HI_N05-537 |
| Sep | YP_001589014.1 | <i>Salmonella enterica</i> subsp. <i>enterica</i> serovar Paratyphi B str. SPB7       |
| Ses | ZP_02663925.1  | <i>Salmonella enterica</i> subsp. <i>enterica</i> serovar Schwarzengrund str. SL480   |
| Sev | ZP_02706803.1  | <i>Salmonella enterica</i> subsp. <i>enterica</i> serovar Virchow str. SL491          |
| Sej | ZP_02653520.1  | <i>Salmonella enterica</i> subsp. <i>enterica</i> serovar Javiana str. GA_MM04042433  |
| Rba | ZP_01014392.1  | <i>Rhodobacterales bacterium</i> HTCC2654                                             |
| Gox | YP_191889.1    | <i>Gluconobacter oxydans</i> 621H                                                     |

|     |     |                                                              |     |
|-----|-----|--------------------------------------------------------------|-----|
| Nbr | 256 | GGFTRGLYEVSAAN-----EHADVILMDDDILCEPETVVRLNAFANMTV-EPTLV      | 304 |
| Nf1 | 254 | GGFTRGLYEVSAVN-----EHADVILMDDDILCEPETVLRRLNAFANLTV-EPTLV     | 302 |
| Rr1 | 250 | GGFTRGMYEVSGIN-----EHANLILMDDDILCEPESILRMNAFANVTT-EPTLV      | 298 |
| Ser | 272 | GGFSRGLAESVRCR-----GRVNTLLI DDDVRLPEPETSRLMTFAACTA-EPSLV     | 320 |
| Bde | 298 | GGFSRGMYEETLKAGA-----SSYTLLLLDDDAISEPEAILRSMQFADYTK-KPTIV    | 346 |
| Ban | 296 | GGFSRGMYEETLKAGT-----SAHTLLLLDDDAISEPESII RAVQFADYCN-TPTIV   | 344 |
| Bl1 | 259 | GGFSRGMFETVKAGK-----SDYTLLLLDDDAISEPESILRAVHFADYTV-RSALV     | 307 |
| Mth | 234 | GGYSRVMYEALKN-----TDCQQILFMDDDIRLEPDSILRVLAMHRFAK-APMLV      | 282 |
| Mtc | 234 | GGYSRVMYEALKN-----TDCQQILFMDDDIRLEPDSILRVLAMHRFAK-APMLV      | 282 |
| Mma | 232 | GGYSRVMYEALKN-----TDCQQILFMDDDIRLEPDSILRVLAMHRFAK-SPMLV      | 280 |
| Mul | 232 | GGYSRVMYEALKN-----TDCQQILFMDDDIRLEPDSILRVLAMHRFAK-SPMLV      | 280 |
| Mle | 232 | GGYSRVMYEALKN-----TDCQQILFMDDDIRLEPDSILRVLAMHRFAK-SPMLV      | 280 |
| Mav | 235 | GGYSRVMYEALKN-----TDCQQILFMDDDIRLEPDSILRVLAMHRFAK-SPMLV      | 283 |
| Map | 229 | GGYSRVMYEALKN-----TDCQQILFMDDDIRLEPDSILRVLALHRFAK-TPMLI      | 277 |
| Mj1 | 232 | GGYSRVMYEALKN-----TDCQQILFMDDDIRLEPDSILRVLALHRFAK-TPMLI      | 280 |
| Mmc | 245 | GGYSRVMYEALKN-----TDCEQILFMDDDIRVEPDSVLRALALNRFK-SPMLV       | 293 |
| Mva | 245 | GGYSRVMYEALKN-----TDCEQILFMDDDIRVEPDSVLRALALNRFK-SPMLV       | 293 |
| Mgi | 254 | GGYSRVMYEALKN-----TDCEQILFMDDDIRLEPDSILRALALNRFK-VPTLV       | 302 |
| Msm | 247 | GGYSRVMYEALKN-----TDCEQILFMDDDIRVEPDSILRALALNRFK-VPTLV       | 295 |
| Mab | 245 | GGYSRVMYEALKN-----TDCEQILFMDDDIRLEPDSILRALAMNRFK-SPILV       | 293 |
| Rr2 | 245 | GGYSRVMYEALKN-----TDCEQILFMDDDIRLEPDSILRALALNRFK-SPMLV       | 293 |
| Nf2 | 245 | GGYSRVMYEALKN-----TDCEQILFMDDDIRLEPDSILRALALNRFK-SPMLV       | 293 |
| Cur | 246 | GGYSRIMYEALKT-----TDCQHILFMDDDIRLEPDSILRALAMSRFAK-TPMLV      | 294 |
| Cje | 245 | GGYSRVMYEALKT-----TDAEYIVFMDDDIRLEPDSILRALAFARFAK-SPVLV      | 293 |
| Cg1 | 269 | GGYSRIMYEAERHAEGR-----TSPFILYMDDDIRLEPDSVLRSLAAARYAR-SPMLI   | 320 |
| Cg2 | 276 | GGYSRIMYEALHEERGT-----TSPYILYMDDDIRLEPDSVLRALAAARYAK-SPMLI   | 327 |
| Cg3 | 250 | GGYSRIMFEALGGVDGKGEAGAAKSPYILYMDDDIRLEPDSVLRALQVARYAK-SPILV  | 307 |
| Cgr | 253 | GGYSRIMFEALGGVDGKGEAGAAKSPYILYMDDDIRLEPDSVLRALQVARYAK-SPILV  | 310 |
| Cef | 243 | GGYSRIMFEALGGVDGKGEAGAAKSPYILYMDDDIRLEPDSVLRALQVARYAK-SPILV  | 300 |
| Cdi | 243 | GGYSRIMFEALGGVDGKGEAGAAKSPYILYMDDDIRLEPDSVLRALQVARYAK-SPILV  | 300 |
| Se1 | 285 | GGYSRIMFEALGGVDGTGEAGASKSPYILYMDDDIRLEPDSVLRALQAARYAK-SPMLI  | 342 |
| Se2 | 242 | GGYSRIMYEALGGVDGTPAGAAQSPYILYMDDDIRLEPDSVLRALQVARYAK-SPILV   | 299 |
| Rsa | 263 | GGYARIMYEALTT-----TDCEQILFMDDDIRLEPDSVLRALAFSRFAK-QPMLV      | 311 |
| Afb | 260 | GGYGRVMYEALVYN-----SDAEQVLLI DDDIALEPDGVLNANAFARASS-QPVIV    | 308 |
| Aau | 265 | GGFSRGMLEAVDNG-----SDYVLLI DDDVMVEPESINRLITFAELCK-KPTIV      | 312 |
| Kra | 271 | GGFARGMFEAVENG-----SDYVLLMDDDIRVEPESII RLLTFADRCK-TPTIV      | 318 |
| Krh | 271 | GGFARMYEMVVS DK-----SDYVLLI DDDIELETEGVMRAVAFADLCR-KPTIV     | 319 |
| Njs | 268 | GGFARGMFEAVRGER-----SKYVLLI DDDVNIPEGIVRAVQFGDACR-KPTLV      | 316 |
| Cms | 236 | GGFARGMYEASREGG-----SRYVLLI DDDVEVHPESILRAVRFGDFAR-HNTIV     | 284 |
| Cmm | 264 | GGYARGQLESVRKGT-----ATYTMMDDIRVEPEGEVIRAITFADLAR-RPTIV       | 312 |
| Bl2 | 271 | GGFSRGMYEETLKEGA-----SDYVLMDDDIRLEPESIRRAVKFADYAR-TPTIV      | 319 |
| Sen | 271 | GGFSRGMYEETLKEGA-----SDYVLMDDDIRLEPESIRRAVKFADYAR-TPTIV      | 319 |
| Seh | 271 | GGFSRGMYEETLKEGA-----SDYVLMDDDIRLEPESIRRAVKFADYAR-TPTIV      | 319 |
| Sew | 248 | GGFARGMYEVEHGE-----SGYALLI DDDTVLEPESVSRAIAFANHCE-KPTLV      | 296 |
| Sep | 213 | GGFMRGLIEAGKIN-----DIKHVIFMDDDIRGSCIEIESICRTHAFLLMAKDKN TVV  | 262 |
| Ses | 213 | GGFMRGLIEAGKIN-----DIKHVIFMDDDIRGSCIEIESICRTHAFLLMAKDKN TVV  | 262 |
| Sev | 213 | GGFMRGLIEAGKIN-----DVKHVIFMDDDIRGSCIEIESICRTHAFLLMAKDKN TVV  | 262 |
| Sej | 213 | GGFMRGLIEAGKIN-----DVKHVIFMDDDIRGSCIEIESICRTHAFLLMAKDKN TVV  | 262 |
| Rba | 213 | GGFMRGLIEAGKIN-----DVKHVIFMDDDIRGSCIEIESICRTHAFLLMAKDKN TVV  | 262 |
| Gox | 213 | GGFMRGLIEAGKIN-----DVKHVIFMDDDIRGSCIEIESICRTHAFLLMAKDKN TVV  | 262 |
|     | 213 | GGFMRGLIEAGKIN-----DIKHVIFMDDDIRGSCIEIESICRTHAFLLMAKDKN TVV  | 262 |
|     | 213 | GGFMRGLIEAGKIN-----DVKHVIFMDDDIRGSCIEIESICRTHAFLLMAKDKN TVV  | 262 |
|     | 208 | GGFTRTMVEATSVATP-----ATHHLLMDDDIRILDPRVNRALGFLAYVE-GELAV     | 257 |
|     | 169 | AGFTRGII EALSDPN-----ITHVVL MDDDIRVEVDAGLLCRIR SALAYIS-POICI | 217 |

**Figure S1.** DDD motif is conserved among GlfT2 variants. Sequences are labeled according to Table S1, and the label for GlfT2 is in red. The DDD motif (Asp256–Asp258 for GlfT2) is invariant among these homologs, and the nearby residues are conserved. This alignment is colored using ClustalW2 coloring to indicate conservation.



|     |     |                                                                  |     |
|-----|-----|------------------------------------------------------------------|-----|
| Nbr | 383 | WDDVEYGI RAREAGFVTVTL PNAAVWHADFYWKDYD--DWARYFSMRNSLIVGALHTDLD   | 440 |
| Nf1 | 381 | WDDVEYGL RAREHG FVTVTL PNAAVWHADFYWKDYD--DWARYFSTRNSLIVGAMHTDLD  | 438 |
| Rr1 | 377 | WDDIEYGI RARAAGFVTVTL PNAGVWHADFWHKDRD--DWAKYFSIRNSLIAAALHSDFD   | 434 |
| Ser | 414 | WDDVEFGL RARAAGYPTIAL PGAGVWHGDSRWRSDQ--DHAGYFHLRNGLITAGLHGGFG   | 471 |
| Bde | 430 | FDDTEYAVRALEHG YHTVCL PGVAVVWHQAWHDKDP SRTWEEYFFQRNRWICGLLHCPKP  | 488 |
| Ban | 428 | FDDIEYGL RAKEHG FHTVSL PGVAVVWHQAWHDKDP GRTWEEYFNRRNRWVCALLHAEKP | 486 |
| Bl1 | 391 | FDDIEYGL RAKEHG VPTISL PGVAVVWHMGWHDKDP ARGWEEYFTQRNRWICALLHFPNA | 449 |
| Mth | 370 | WDDADYGL RAAEHG YPTVTL PGAAIWHMAWS DKDDAIDWQAYFHLRNRLVVAAMHWDGP  | 428 |
| Mtc | 370 | WDDADYGL RAAEHG YPTVTL PGAAIWHMAWS DKDDAIDWQAYFHLRNRLVVAAMHWDGP  | 428 |
| Mma | 370 | WDDADYGL RAAEHG YPTVTL PGAAIWHMAWS DKDDAIDWQAYFHLRNRLVVAAMHWDGP  | 428 |
| Mul | 368 | WDDADYGL RAAEHG YPTVTL PGAAIWHMAWS DKDDAIDWQAYFHLRNRLVVAAMHWDG-  | 425 |
| Mle | 368 | WDDADYGL RAAEHG YPTVTL PGAAIWHMAWS DKDDAIDWQAYFHLRNRLVVAAMHWDG-  | 425 |
| Mav | 371 | WDDADYGL RAAEHG YPTVTL PGAAIWHMAWS DKDDAIDWQAYFHLRNRLVVAAMHWDG-  | 428 |
| Map | 365 | WDDAEYGL RAGEHG YPTVTL PGAAIWHMAWS DKDDAIDWQAYFHLRNRLVVAALHWDG-  | 422 |
| Mj1 | 368 | WDDAEYGL RAGEHG YPTVTL PGAAIWHMAWS DKDDAIDWQAYFHLRNRLVVAALHWDG-  | 425 |
| Mmc | 381 | WDDAEYGL RAAEQGYPTATMPGTAIWHMAWS DKDDAIDWQAYFHLRNRLVVAALHWDG-    | 438 |
| Mva | 381 | WDDAEYGL RAAEQGYPTATMPGTAIWHMAWS DKDDAIDWQAYFHLRNRLVVAALHWDG-    | 438 |
| Mgi | 391 | WDDADYGL RAGEHG YPTVTL PGAAIWHMAWS DKDDAIDWQAYFHLRNRLVVAALHWDG-  | 448 |
| Msm | 384 | WDDAEYGL RAGEHG YPTVTL PGAAIWHMAWS DKDDAIDWQAYFHLRNRLVVAALHWDG-  | 441 |
| Mab | 382 | WDDAEYGL RAGEHG YGTVTL PGAAIWHMAWS DKDDAIDWQAYFHLRNRLVVAALHWDG-  | 439 |
| Rr2 | 382 | WDDAEYGL RANEHG YGTASMPGTAIWHMAWS DKDDAIDWQAYFHLRNRLVVAALHWDN-   | 439 |
| Nf2 | 382 | WDDAEYGL RANEHG YGTASMPGTAIWHMAWS DKDDAIDWQAYFHLRNRLVVAALHWDN-   | 439 |
| Cur | 381 | WDDAEYGL RARDAGYPTVTMPGTAIWHMAWS DKDDAIDWQAYFHLRNRLVVAALHMPG-    | 438 |
| Cje | 380 | WDDVEYGL RAREAGYPTVTL PGAAVWHMAWS DKDDAIDWQAYFHLRNRLVVAALHLPG-   | 437 |
| Cg1 | 418 | WDDGEFGL RAKDAGFP TASWPGIAIWHMAWS DKDDAIDWQAYFHLRNRLVVAALHHDG-   | 475 |
| Cg2 | 445 | WDDGEFGL RAKDAGFP TASWPGIAIWHMAWS DKDDAIDWQAYFHLRNRLVVAALHHDG-   | 502 |
| Cg3 | 403 | WDDAEYGL RARKAGFP TATWPGIAIWHMAWS DKDDAIDWQAYFHLRNRLVVAAMYHOG-   | 460 |
| Cgr | 406 | WDDAEYGL RARKAGFP TATWPGIAIWHMAWS DKDDAIDWQAYFHLRNRLVVAAMYHOG-   | 463 |
| Cef | 396 | WDDAEYGL RARKAGFP TATWPGIAIWHMAWS DKDDAIDWQAYFHLRNRLVVAAMYHOG-   | 453 |
| Cdi | 396 | WDDAEYGL RARKAGFP TATWPGIAIWHMAWS DKDDAIDWQAYFHLRNRLVVAAMYHOG-   | 453 |
| Se1 | 438 | WDDAEYGL RAGAAGFP TATWPGIAIWHMAWS DKDDAIDWQAYFHLRNRLVVAAMNHDG-   | 495 |
| Se2 | 395 | WDDAEYGL RAGNAGFATATWPGVAIWHLAWSDKDDAIDWQAYFHLRNRLVVAALHGGP-     | 451 |
| Rsa | 395 | WDDVEYGL RAGAAGFP TVTVPGIAVWHMSFADKHD SLNQWEYFLTRNQLVVAALHGGP-   | 452 |
| Afb | 392 | WDDAEYSL RAGGHG YPTVTL PGAAIWHMPWTDKNDATDWTAYFHTRNRLILAALHSPDE   | 450 |
| Aau | 397 | WDDAEYGL RAKQHG YATVSL PGAAVWHVSWIDKDDL VGWQAYFHTRNRLITALLHSPYE  | 455 |
| Kra | 403 | WDDSEYGL RAKAHG FPTVSL PGS AVWHVSWIDKDDL VGWQAYFHARNRVIAALLHSPYE | 461 |
| Krh | 402 | WDDAEYSL RGRAAGFP TVTL PGAAVWHVSWADKDDSDVDWQAYYHERNRLIATLLHSPFP  | 460 |
| Njs | 400 | WDDAEYGL RAMEHG YSTVSL PGACVWHVSWNDKDDTIDWQAYYHERNRLVALLHSPYE    | 458 |
| Cms | 368 | WDDAEFGL RAKQAG YSTVSL PGVAVVWHMPWTEKDDTIDWQAYYHARNRWLAALLHSPYS  | 426 |
| Cmm | 396 | WDDSEFGL RAKEAG YPTVTF PGAAVWHVPWTDKNDGLDWQAYFHQRNRFVAALLHSPYP   | 454 |
| Bl2 | 401 | WDDAEYAL RAKEVG VPTVTL PGAAVWHVSWVDKDDSDQWQAF FHARNRLIAALLHSPYE  | 459 |
| Sen | 401 | WDDAEYAL RAKEVG VPTVTL PGAAVWHVSWVDKDDSDQWQAF FHARNRLIAALLHSPYE  | 459 |
| Seh | 380 | NDDVEYGVRAQRAGYRTVTVPGVCLWHQS FVDKDDQLDWQAYYHIRNRTIMGLLYANQQ     | 438 |
| Sew | 338 | GDDLDFGYMHKKH--NIVTLNGVASWQMDFER--KISVLNSYLNFRFVAVPALISKRK-      | 391 |
| Sep | 338 | GDDLDFGYMHKKH--NIVTLNGVASWQMDFER--KISVLNSYLNFRFVAVPALISKRK-      | 391 |
| Sev | 338 | GDDLDFGYMHKKH--NIVTLNGVASWQMDFER--KISVLNSYLNFRFVAVPALISKRK-      | 391 |
| Sej | 338 | GDDLDFGYMHKKH--NIVTLNGVASWQMDFER--KISVLNSYLNFRFVAVPALISKRK-      | 391 |
| Rba | 338 | GDDLDFGYMHKKH--NIVTLNGVASWQMDFER--KISVLNSYLNFRFVAVPALISKRK-      | 391 |
| Gox | 338 | GDDLDFGYMHKKH--NIVTLNGVASWQMDFER--KISVLNSYLNFRFVAVPALISKRK-      | 391 |
|     | 335 | GDDIEYGCMAANGVETICLPGVAVWHESFHHK--TSDWLTYYDMRNRLFVASLYPOLV       | 391 |
|     | 298 | GDDAEYGLRLKRAGFPTVMWPGVYVAHPNLQN--QTRPWHHYDRRNALICALLERGAV       | 354 |

**Figure S2.** DDA motif is conserved among GlfT2 variants. Sequences are labeled according to Table S1, and the label for GlfT2 is in red. The Asp residues in the DDA motif (Asp371–Ala373 for GlfT2) are invariant among these homologs, and nearby residues are conserved. This alignment is colored using ClustalW2 coloring to indicate conservation.

```

Glft2 160 -----
2z86A 111 PLDWPSDLTL PPLPESTNDY VWAGKRKELL II--DGLSIV IPTYNRAKIL

Glft2 176 VNALRELTAD -PLVDQVIGA VIVPDQGERK VRDHPDFPAA AARLGSRLSI
2z86A 166 AITLACLNCQ KTIYD---YE VIVADDGSK- --EN--IEEI VREFESLLNI

Glft2 225 HDQPNLGGSG GYSRVMYEAL KNTDCQQILF MDDDIRLEPD SILRVLAMHR
2z86A 208 KYVRQKDYGY QLC AVRNLGL RAAKYNVVAI LDCDMAPNPL WVQSYMELLA

Glft2 275 FAKAPMLVGG QMLNLQE-PS HLHIMGEVVD RSIFMWTAAP HAEYDHDFAE
2z86A 258 VDDNVALIGP RKYIDTSKHT Y----LDFLS QKSLINEIPE SV--DWRIEH

Glft2 324 YPLNDNNSRS KLLHRRIDVD YNGWWTMIP RQVAEELGQP LPLFIKWDDA
2z86A 317 FKN-TDN--- -LRLCNTPFR FFSGGNVAFA KKWLFragWF DEEFTHWGGE

Glft2 374 --DYGLRAAE HGYPTVTLPG AAIWHMA--- -----
2z86A 362 DNEFGYRLYR EGCYFRSVEG AMAYHQEPPQ LLQQKVPYFY RKKEKIESAT

```

**Figure S3.** Alignment used for homology model of Glft2. This alignment was generated by the SWISS-MODEL server and used as the basis for the homology model shown in Figure 3B. This region of the Glft2 sequence corresponds to its GT2 domain. The DDD and DDA motifs in Glft2 are highlighted in red. This alignment showed 14.8% identity between the two sequences with an e-value of  $3.6 \times 10^{-9}$ .

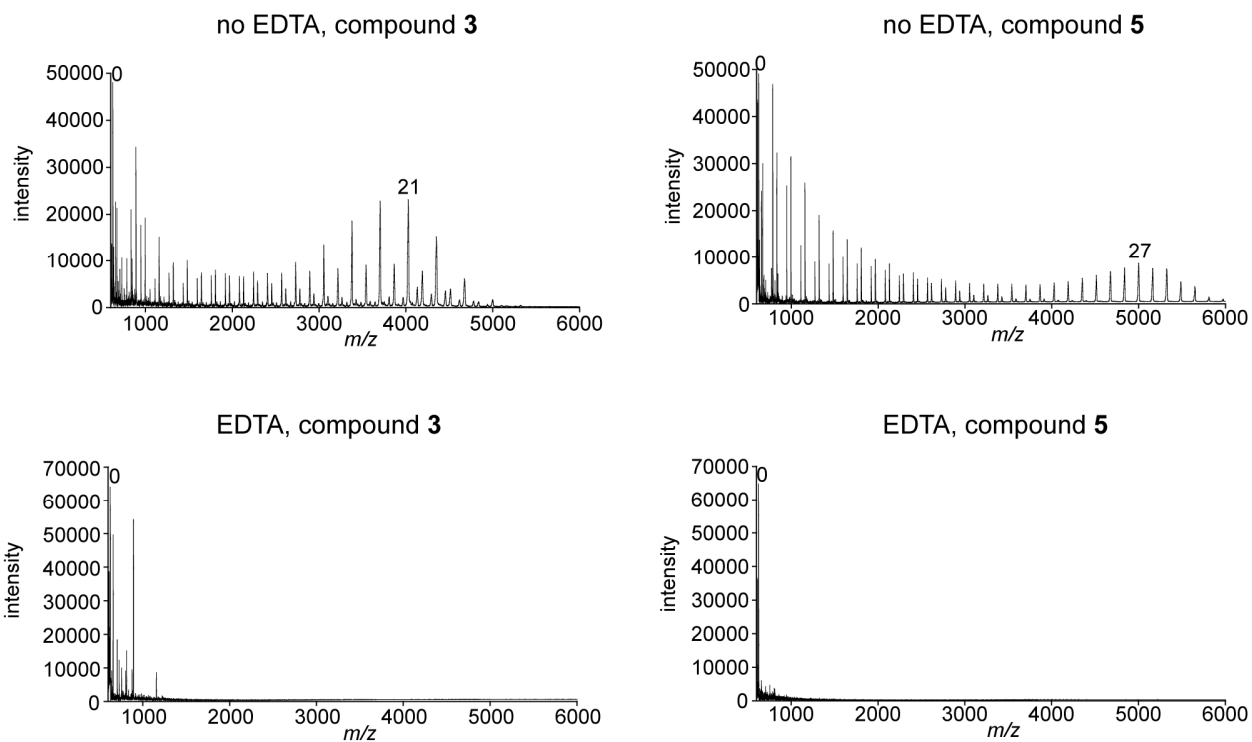

**Figure S4.** GlfT2 catalysis is metal-dependent. Spectra from MALDI-TOF MS analysis of GlfT2 reactions are shown. Products corresponding to addition of  $n$  Gal $f$  residues to compound **3** (left) or compound **5** (right) are observed from reactions of GlfT2, acceptor, and UDP-Gal $f$  only when metal ( $\text{Mg}^{2+}$ ; “no EDTA”) is present. In the presence of EDTA and absence of added metal, no products are observed from reactions with either acceptor (bottom spectra).

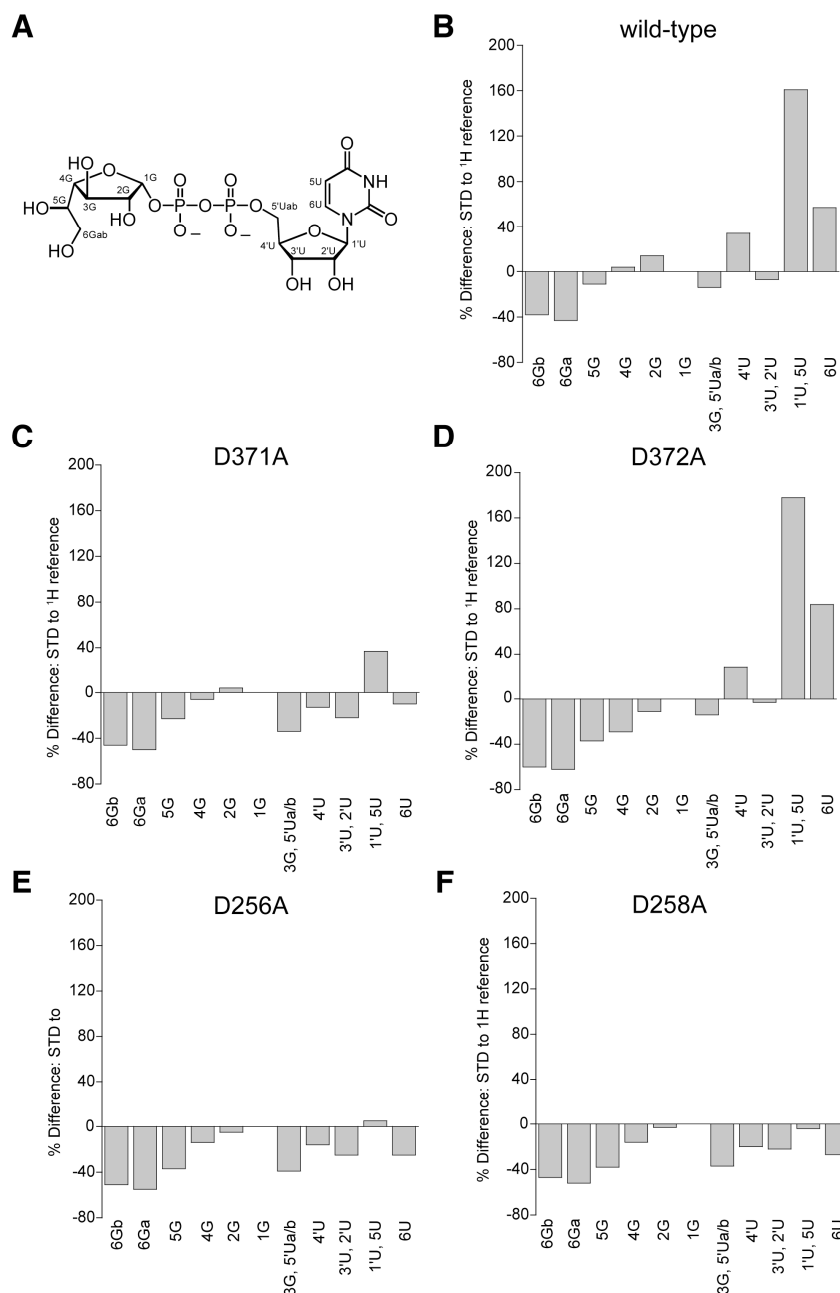

**Figure S5.** Analysis of STD NMR spectra for GlfT2 variants binding to UDP-Galf. Addition of wild-type GlfT2 (B), D371A GlfT2 (C), D372A GlfT2 (D), D256A GlfT2 (E), or D258A GlfT2 (F) to a solution containing UDP-Galf results in saturation transfer difference NMR signals at the indicated protons in the UDP-Galf ligand (A). The signal for each distinct proton is plotted to give an STD NMR profile. Comparison of STD NMR profiles for the variants indicates that D372A and wild-type GlfT2 bind UDP-Galf in a similar manner, D256A and D258A bind UDP-Galf similarly to each other but distinctly from wild-type GlfT2, and D371A binds UDP-Galf in a manner distinct from wild-type GlfT2.

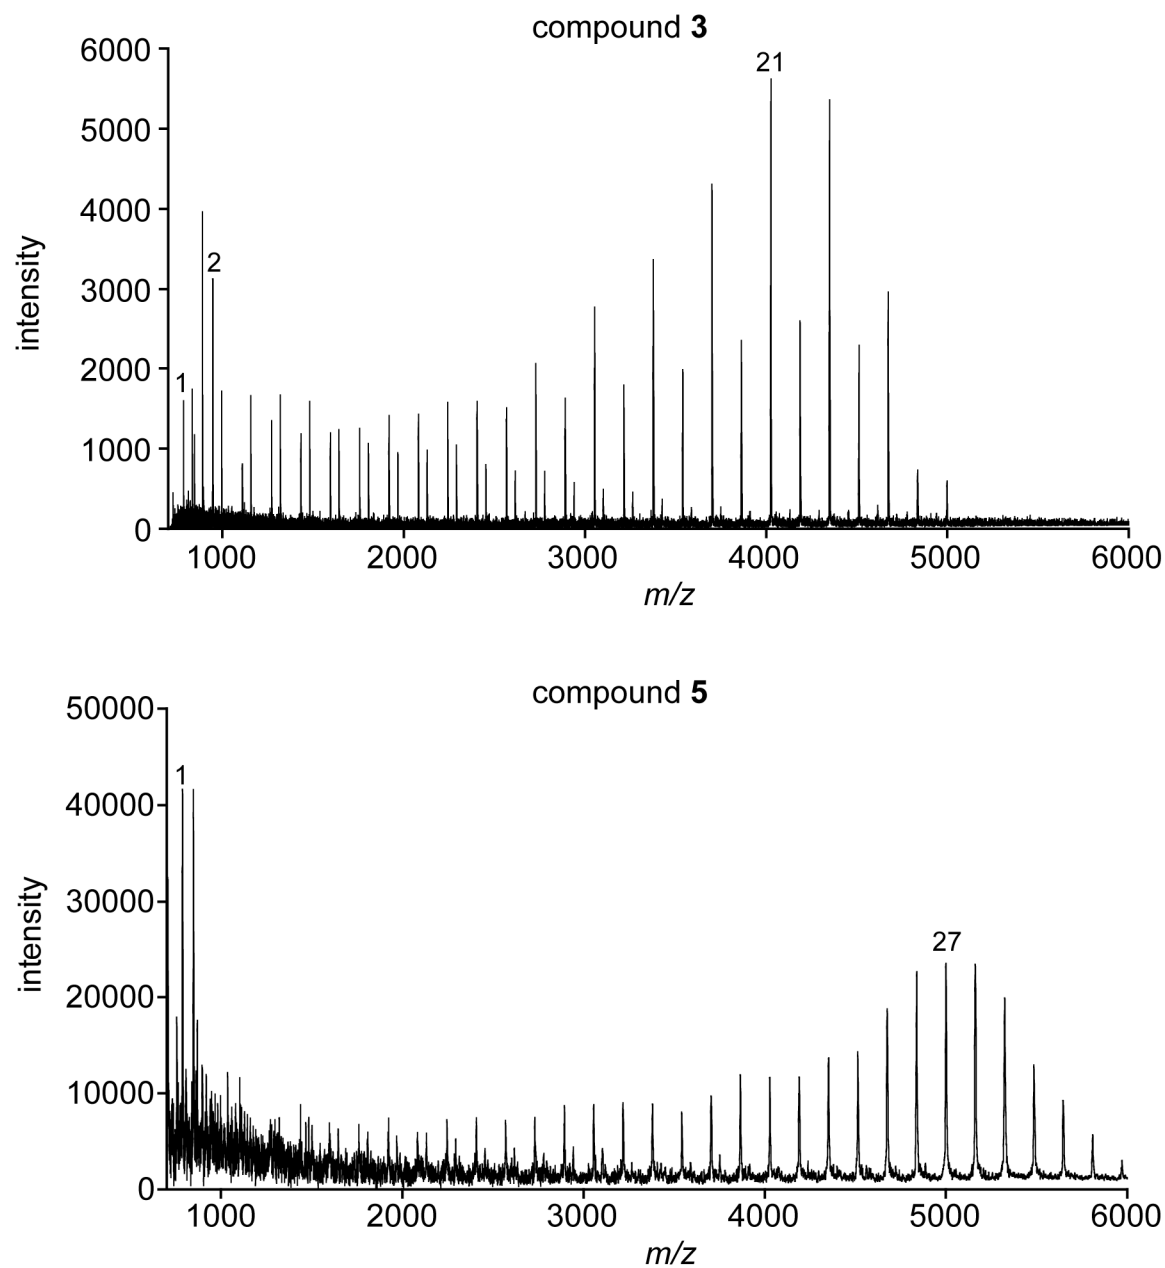

**Figure S6.** GlfT2 D371E variant shows wild-type polymerization activity. Spectra from MALDI-TOF MS analysis of 20 h incubations of GlfT2 D371E with either compound **3** (top) or compound **5** (bottom) show polymeric products. To orient these spectra with those shown in Figure 5, certain peaks that correspond to  $[M+Na]^+$ , where M equals the mass of the acceptor plus  $n$  Gal $f$  residues, are labeled with the appropriate value of  $n$ . Labels are shown only for the short products ( $n = 1, 2$ ) and for the highest-intensity peak of the polymeric products ( $n = 21, 27$ ).



**A**

```

SpHasA  41  -----KVAAV  IPSYNEDAES  LLETLKSVLA  QTYPLSEIYI  VDDGSSNTDA
3bcvB   3  LIP--KSVVI  VPIYNVE-KY  LDQCQVQALLA  QTLSDIEIIL  IDDESP-DNC

SpHasA  86  IQLIEEYVNR  EVDICRNVIV  HRSLVNKGKR  HAQAWAFERS  DADVFLTVDS
3bcvB   49  PKICDDYAAQ  YPN-----IK  VIHKKNAGLG  XACNSGLDVA  TGEYVAFCDL

SpHasA 136  DTYIYPNALE  ELLKSFNDET  VYAATGHLNA  RNRQTNLLTR  LTDIRYDNAF
3bcvB   94  DDYVDSXYYX  TXYNVAQKYT  CDAVFTFKLY  KNKNEI-HTL  LKDLIASDPY

SpHasA 186  GVERAAQSLT  GNILVCSGPL  SIYRREVIIP  NLERYKNQTF  LGLPVSIGDD
3bcvB  163  AREE-----  -RAIQVSAKV  VLYRRNLIEK  KHLRFVSER-  ----ILPSED

SpHasA 236  RCLTNYAIDL  GRTVY  --
3bcvB  201  LIFNVDVLAN  SNIVCVLP

```

**B**

```

CesA   145  -----PDE  WPTVDIFVPT  YNEELSIVRL  TVLGSLGIDW
1xhbA  95  NRSLPDVRL  GCKTKVYPDN  LPTTSVVIVF  HNEAWSTLLR  TVHSVINRSP

CesA   178  PPEKVRVHIL  DDGRRPE-FA  AFAAECG---  ---ANYIARP  TNEHAKAGNL
1xhbA  145  RHMIEEIVLV  DDASERDFLK  RPLESYVKKL  KVPVHVIRME  QRS-GLIRAR

CesA   221  NYAIGHTDGD  YILIFDCDHV  PTRAFQLQTM  GWMVEDPKIA  LMQTPHHFYS
1xhbA  194  LKGAAVSRGQ  VITFLDAHCE  CTAGWLEPLL  ARIKHDRRTV  VCPPII-DVIS

CesA   271  PDPFQRNLSA  GYR-----  -----TPPE  GNLFGYGVVQD  GNDFWDATFF
1xhbA  243  DDTFEYMAGS  DMTYGGFNWK  LNFRWYPVPQ  REMDRR-KGD  RTLPVRTPTM

CesA   308  CGSCAILRRT  AIEQIGGFAT  QTV---TEDA  HTALKMQRLG  WSTAYL  ---
1xhbA  292  AGGLFSIDRD  YFQEIGTYDA  GMDIWGGENL  EISFRIWQCG  GTLEIVTCSH

```

**Figure S7.** Sequence alignments used for homology modeling of other GT-2 glycosyltransferases. (A) Alignment of hyaluronan synthase from *Streptococcus pyogenes* (SpHasA; GenBank accession number AAA17984.1) with the sequence of a glycosyltransferase PDB ID: 3BCV. This alignment, generated automatically by SWISS-MODEL, was used for the subsequent homology model of SpHasA, which showed 18.6% identity between the two sequences and gave an e-value of  $1.3 \times 10^{-14}$ . (B) Alignment of cellulose synthase from *Gluconacetobacter xylinus* (CesA; GenBank accession number P21877.3) with the glycosyltransferase UDP-GalNAc:polypeptide  $\alpha$ -N-acetylgalactosaminyltransferase-T1 (PDB ID: 1XHB). This alignment was generated automatically in SWISS-MODEL and was used for subsequent homology modeling. This alignment showed 13.1% sequence identity between the two sequences with an e-value of  $1.6 \times 10^{-11}$ .

**Table S2.** Oligonucleotide primers used for site-directed mutagenesis. For each desired mutation, the primer indicated in the table and its reverse complement (not shown) were used together in the PCR mixture.

|             |                                                          |
|-------------|----------------------------------------------------------|
| GlfT2 D256A | 5'— CAGATCCTATTCATGG <u>GCC</u> GACGACATCCGCCTC—3'       |
| GlfT2 D256E | 5'— CAGATCCTATTCATGG <u>GAG</u> GACGACATCCGCCTC—3'       |
| GlfT2 D258A | 5'— CTATTCATGGACGACG <u>GCC</u> ATCCGCCTCGAGCCG—3'       |
| GlfT2 D258E | 5'— CTATTCATGGACGACG <u>GAG</u> ATCCGCCTCGAGCCG—3'       |
| GlfT2 D371A | 5'— GCCGTTGTTTCATCAAATGGG <u>GCC</u> GACGCCGATTACGGCC—3' |
| GlfT2 D371E | 5'— GCCGTTGTTTCATCAAATGGG <u>GAA</u> GACGCCGATTACGGCC—3' |
| GlfT2 D372A | 5'— GCCGTTGTTTCATCAAATGGGACG <u>GCC</u> GCCGATTACGGCC—3' |
| GlfT2 D372E | 5'— GCCGTTGTTTCATCAAATGGGACG <u>GAA</u> GCCGATTACGGCC—3' |
