# Supplementary material
Source: PubMed Central journal article supplement (PMC3326345)
Supplement: NIHMS348833-supplement-2_si_002.pdf [file NIHMS348833-supplement-2_si_002.pdf]

## Supporting Information

### Processive Carbohydrate Polymerases Mediate Bifunctional Catalysis Using a Single

### Active Site

John F. May, Matthew R. Levensgood, Rebecca A. Splain, Christopher D. Brown, & Laura L. Kiessling

**Table S1** GltT2 homologs used in the multiple sequence alignment.

| Abbreviation | GenBank Accession Number or NCBI Reference Sequence | Source of sequence (bacterial species)                  |
|--------------|-----------------------------------------------------|---------------------------------------------------------|
| Nbr          | BAF46769.1                                          | <i>Nocardia brasiliensis</i>                            |
| Nf1          | YP_116420.1                                         | <i>Nocardia farcinica</i> IFM 10152                     |
| Rr1          | YP_704064.1                                         | <i>Rhodococcus</i> sp. RHA1                             |
| Ser          | YP_001107843.1                                      | <i>Saccharopolyspora erythraea</i> NRRL 2338            |
| Bde          | ZP_02917795.1                                       | <i>Bifidobacterium dentium</i> ATCC 27678               |
| Ban          | ZP_02964173.1                                       | <i>Bifidobacterium animalis</i> subsp. lactis HN019     |
| Bll          | NP_695433.1                                         | <i>Bifidobacterium longum</i> NCC2705                   |
| <b>Mth</b>   | <b>NP_218325.1</b>                                  | <b><i>Mycobacterium tuberculosis</i> H37Rv</b>          |
| Mtc          | NP_338467.1                                         | <i>Mycobacterium tuberculosis</i> CDC1551               |
| Mma          | YP_001853631.1                                      | <i>Mycobacterium marinum</i> M                          |
| Mul          | YP_908340.1                                         | <i>Mycobacterium ulcerans</i> Agy99                     |
| Mle          | NP_301191.1                                         | <i>Mycobacterium leprae</i> TN                          |
| Mav          | YP_879503.1                                         | <i>Mycobacterium avium</i> 104                          |
| Map          | NP_959146.1                                         | <i>Mycobacterium avium</i> subsp. paratuberculosis K-10 |
| Mjl          | YP_001073654.1                                      | <i>Mycobacterium</i> sp. JLS                            |
| Mmc          | YP_642179.1                                         | <i>Mycobacterium</i> sp. MCS                            |
| Mva          | YP_956420.1                                         | <i>Mycobacterium vanbaalenii</i> PYR-1                  |
| Mgi          | YP_001132430.1                                      | <i>Mycobacterium gilvum</i> PYR-GCK                     |
| Msm          | YP_890616.1                                         | <i>Mycobacterium smegmatis</i> str. MC2 155             |
| Mab          | YP_001700925.1                                      | <i>Mycobacterium abscessus</i>                          |
| Rr2          | YP_704009.1                                         | <i>Rhodococcus</i> sp. RHA1                             |
| Nf2          | YP_116383.1                                         | <i>Nocardia farcinica</i> IFM 10152                     |
| Cur          | YP_001799546.1                                      | <i>Corynebacterium urealyticum</i> DSM 7109             |
| Cje          | YP_249900.1                                         | <i>Corynebacterium jeikeium</i> K411                    |
| Cg1          | NP_602073.1                                         | <i>Corynebacterium glutamicum</i> ATCC 13032            |
| Cg2          | YP_227122.1                                         | <i>Corynebacterium glutamicum</i> ATCC 13032            |
| Cg3          | BAC00276.1                                          | <i>Corynebacterium glutamicum</i> ATCC 13032            |
| Cgr          | YP_001139691.1                                      | <i>Corynebacterium glutamicum</i> R                     |
| Cef          | NP_739324.1                                         | <i>Corynebacterium efficiens</i> YS-314                 |
| Cdi          | NP_940506.1                                         | <i>Corynebacterium diphtheriae</i> NCTC 13129           |
| Se1          | YP_001107844.1                                      | <i>Saccharopolyspora erythraea</i> NRRL 2338            |

|     |                |                                                                                       |
|-----|----------------|---------------------------------------------------------------------------------------|
| Se2 | YP_001102444.1 | <i>Saccharopolyspora erythraea</i> NRRL 2338                                          |
| Rsa | YP_001624767.1 | <i>Renibacterium salmoninarum</i> ATCC 33209                                          |
| Afb | YP_832172.1    | <i>Arthrobacter</i> sp. FB24                                                          |
| Aau | YP_948391.1    | <i>Arthrobacter aurescens</i> TC1                                                     |
| Kra | YP_001363614.1 | <i>Kineococcus radiotolerans</i> SRS30216                                             |
| Krh | YP_001854751.1 | <i>Kocuria rhizophila</i> DC2201                                                      |
| Njs | YP_922603.1    | <i>Nocardioides</i> sp. JS614                                                         |
| Cms | YP_001709406.1 | <i>Clavibacter michiganensis</i> subsp. <i>Sepedonicus</i>                            |
| Cmm | YP_001221762.1 | <i>Clavibacter michiganensis</i> subsp. <i>michiganensis</i> NCPPB 382                |
| Bl2 | NP_695432.1    | <i>Bifidobacterium longum</i> NCC2705                                                 |
| Sen | ZP_02701557.1  | <i>Salmonella enterica</i> subsp. <i>enterica</i> serovar Newport str. SL317          |
| Seh | ZP_02665507.1  | <i>Salmonella enterica</i> subsp. <i>enterica</i> serovar Heidelberg str. SL486       |
| Sew | ZP_02832148.1  | <i>Salmonella enterica</i> subsp. <i>enterica</i> serovar Weltevreden str. HI_N05-537 |
| Sep | YP_001589014.1 | <i>Salmonella enterica</i> subsp. <i>enterica</i> serovar Paratyphi B str. SPB7       |
| Ses | ZP_02663925.1  | <i>Salmonella enterica</i> subsp. <i>enterica</i> serovar Schwarzengrund str. SL480   |
| Sev | ZP_02706803.1  | <i>Salmonella enterica</i> subsp. <i>enterica</i> serovar Virchow str. SL491          |
| Sej | ZP_02653520.1  | <i>Salmonella enterica</i> subsp. <i>enterica</i> serovar Javiana str. GA_MM04042433  |
| Rba | ZP_01014392.1  | <i>Rhodobacteriales bacterium</i> HTCC2654                                            |
| Gox | YP_191889.1    | <i>Gluconobacter oxydans</i> 621H                                                     |

|            |     |                                                             |     |
|------------|-----|-------------------------------------------------------------|-----|
| Nbr        | 256 | GGFTRGLYEVSAAAN-----EHADVILMDDDILCEPETVVRLNAFANMTV-EPTLV    | 304 |
| Nf1        | 254 | GGFTRGLYEVS AVN-----EHADVILMDDDILCEPETVLRNNAFANLTV-EPTLV    | 302 |
| Rr1        | 250 | GGFTRGMYEVS GIN-----EHANLILMDDDILCEPESILRMNAFANVTT-EPTLV    | 298 |
| Ser        | 272 | GGFSRGLAESVRCR-----GRVNTLLIDDDVRLEPETLSRLMTFAACTA-EPSLV     | 320 |
| Bde        | 298 | GGFSRGMYEETLKAGA-----SSYTLILLDDDAISEPEAILRSMQFADYTK-KPTIV   | 346 |
| Ban        | 296 | GGFSRGMYEETLKAGT-----SAHTLLLDLDDAISEPEIIRAVQFADYCN-TPTIV    | 344 |
| Bl1        | 259 | GGFSRGMFETVKAGK-----SDYTLILLDDDAISEPESILRAVHFADYTV-RSALV    | 307 |
| <b>Mth</b> | 234 | GGYSRVMYEALKN-----TDCQQILFMDDDIRLEPDSILRVLAMHRFAK-APMLV     | 282 |
| Mtc        | 234 | GGYSRVMYEALKN-----TDCQQILFMDDDIRLEPDSILRVLAMHRFAK-APMLV     | 282 |
| Mma        | 232 | GGYSRVMYEALKN-----TDCQQILFMDDDIRIEPDSILRVLAMHRFAK-SPMLV     | 280 |
| Mul        | 232 | GGYSRVMYEALKN-----TDCQQILFMDDDIRIEPDSILRVLAMHRFAK-SPMLV     | 280 |
| Mle        | 235 | GGYSRVMYEALKN-----TDCQQILFMDDDIRIEPDSILRVLAMHRFAK-SPMLV     | 283 |
| Mav        | 229 | GGYSRVMYEALKN-----TDCQQILFMDDDIRIEPDSILRVLALHRFAK-TPMLI     | 277 |
| Map        | 232 | GGYSRVMYEALKN-----TDCQQILFMDDDIRIEPDSILRVLALHRFAK-TPMLI     | 280 |
| Mjl        | 245 | GGYSRVMYEALKN-----TDCEQILFMDDDIRVEPDSVLRALALNRFK-SPMLV      | 293 |
| Mmc        | 245 | GGYSRVMYEALKN-----TDCEQILFMDDDIRVEPDSVLRALALNRFK-SPMLV      | 293 |
| Mva        | 254 | GGYSRVMYEALKN-----TDCEQILFMDDDIRIEPDSILRALALNRFK-VPTLV      | 302 |
| Mgi        | 247 | GGYSRVMYEALKN-----TDCEQILFMDDDIRVEPDSILRALALNRFK-VPTLV      | 295 |
| Msm        | 245 | GGYSRVMYEALKN-----TDCEQILFMDDDIRIEPDSILRALAMNRFK-SPILV      | 293 |
| Mab        | 245 | GGYSRVMYEALKN-----TDCEQILFMDDDIRIEPDSILRALALNRFK-SPMLV      | 293 |
| Rr2        | 246 | GGYSRIMYEALKT-----TDCQHILFMDDIEIEPDSILRALAMSRFAK-TPMLV      | 294 |
| Nf2        | 245 | GGYSRVMYEALKT-----TDAEYIVFMDDIEIEPDSILRALAFARFAK-SPVLV      | 293 |
| Cur        | 269 | GGYSRIMYEARHAERGT-----TSPFILYMDDDIQIEPDSVLRSLAAARYAR-SPMLI  | 320 |
| Cje        | 276 | GGYSRIMYEALHEERGT-----TSPYILYMDDIIAIEPDSVLRALAAARYAK-SPMLI  | 327 |
| Cg1        | 250 | GGYSRIMFEALGGVDGKGEAGAAKSPYILYMDDIIAIEPDSVLRALQVARYAK-SPILV | 307 |
| Cg2        | 253 | GGYSRIMFEALGGVDGKGEAGAAKSPYILYMDDIIAIEPDSVLRALQVARYAK-SPILV | 310 |
| Cg3        | 243 | GGYSRIMFEALGGVDGKGEAGAAKSPYILYMDDIIAIEPDSVLRALQVARYAK-SPILV | 300 |
| Cgr        | 243 | GGYSRIMFEALGGVDGKGEAGAAKSPYILYMDDIIAIEPDSVLRALQVARYAK-SPILV | 300 |
| Cef        | 285 | GGYSRIMFEALGGVDGTGEAGASKSPYILYMDDIIAIEPDSVLRALQAARYAK-SPMLI | 342 |
| Cdi        | 242 | GGYSRIMYEALGGVDGTKPAGAAQSPYILYMDDIIAIEPDSVLRALQVARYAK-SPILV | 299 |
| Se1        | 263 | GGYARIMYEALTT-----TDCEQILFMDDDVQLEPDTILRALAFSRFAR-QPMLV     | 311 |
| Se2        | 260 | GGFGRVMYEGVYN-----SDAEVMLIDDDIALEPDGVLNANAFARASS-QPVIV      | 308 |
| Rsa        | 265 | GGFSRGMLEAVDNG-----SDYVLLDDDDVMVEPESINRLLTFaelCK-KPTIV      | 312 |
| Afb        | 271 | GGFARGMFEAVENG-----SDYVLLMDDDIVVEPESIIIRLLTFADRCK-TPTIV     | 318 |
| Aau        | 271 | GGFARNMYEMVSDK-----SDYVMLLDDDIETEgVMRAVAFADLCR-KPTIV        | 319 |
| Kra        | 268 | GGFARGMFEAVRGER-----SKYVLLLDDDVNIEPEGIVRAVQFGDACR-KPTLV     | 316 |
| Krh        | 236 | GGFARGMYEASREGG-----SRYVMLLDDDVVEVHPESILRAVRFGDFAR-HNTIV    | 284 |
| Njs        | 264 | GGYARGQLESVRKGT-----ATYTMMDDDIVCEPEGVIRAITFADLAR-RPTIV      | 312 |
| Cms        | 271 | GGFSRGMYEETLKEGA-----SDYVLVMDDDITLPEsIRRavKFADYAR-TPTIV     | 319 |
| Cmm        | 271 | GGFSRGMYEETLKEGA-----SDYVLVMDDDITLPEsIRRavKFADYAR-TPTIV     | 319 |
| Bl2        | 248 | GGFARGMYEVEHHGE-----SGYALLLDDDTVLEPEsVSRAIAFANHCE-KPTLV     | 296 |
| Sen        | 213 | GGFMRGLIEAGKIN-----DIKHVIFMDDDGsCEIEsICRTHAFLLMAKDKNtVV     | 262 |
| Seh        | 213 | GGFMRGLIEAGKIN-----DIKHVIFMDDDGsCEIEsICRTHAFLLMAKDKNtVV     | 262 |
| Sew        | 213 | GGFMRGLIEAGKIN-----DVKHVIFMDDDGsCEIEsICRTHAFLLMAKDKNtVV     | 262 |
| Sep        | 213 | GGFMRGLIEAGKIN-----DVKHVIFMDDDGsCEIEsICRTHAFLLMAKDKNtVV     | 262 |
| Sej        | 213 | GGFMRGLIEAGKIN-----DVKHVIFMDDDGsCEIEsICRTHAFLLMAKDKNtVV     | 262 |
| Rba        | 208 | GGFTRTMVEATSVATP-----ATHHLLMDDDIILDPRVNRALGFLAYVE-GELAV     | 257 |
| Gox        | 169 | AGFTRGIIeALSdPN-----ITHVVLMDDDVeVDAGLLCRIRsALAYIS-POICI     | 217 |

**Figure S1.** DDD motif is conserved among GlfT2 variants. Sequences are labeled according to Table S1, and the label for GlfT2 is in red. The DDD motif (Asp256–Asp258 for GlfT2) is invariant among these homologs, and the nearby residues are conserved. This alignment is colored using ClustalW2 coloring to indicate conservation.

Nbr 383 WDDVEYGIRAREAGFVTVTLPNAAVWHADFYWKDYD-DWARYFSMRNSLIVGALHTDLD 440  
 Nf1 381 WDDVEYGLRAREHGFTVTVTLPNAAVWHADFYWKDYD-DWARYFSTRNSLIVGAMHTDLD 438  
 Rr1 377 WDDIEYGIRARAAGFVTVTLPNAGVWHADFWKDRD-DWAKYFSIRNSLIAAALHSDFD 434  
 Ser 414 WDDVEFGLRARAAGYPTIALPGAGVWHGDSRWRSQD-DHAGYFHLRNLITAGLHGGFG 471  
 Bde 430 FDDTEYAVRALEHGHTVCLPGVAVWHQAWHDKDPSRTWEEYFFQRNRWICGLLHCPKP 488  
 Ban 428 FDDIEYGLRAKEHGFTVSLPGVAVWHQAWHDKDPPGRTWEEYFNRRNRWVCALLHAEKP 486  
 Bl1 391 FDDIEYGLRAKEHGVTISLPGVAVWHMGWHDKDPARGWEEYFTQRNRWICALLHFPNA 449  
**Mth** 370 WDDADYGLRAAEHGYPTVTLPGAIIWHMAWSKDDDAIDWQAYFHLRNLVVAAMHWDGP 428  
 Mtc 370 WDDADYGLRAAEHGYPTVTLPGAIIWHMAWSKDDDAIDWQAYFHLRNLVVAAMHWDGP 428  
 Mma 368 WDDADYGLRAAEHGYPTVTLPGAIVWHMAWSKDDDAIDWQAYFHLRNLVVAAMHWDG- 425  
 Mul 368 WDDADYGLRAAEHGYPTVTLPGAIVWHMAWSKDDDAIDWQAYFHLRNLVVAAMHWDG- 425  
 Mle 371 WDDADYGLRAAEHGYPTVTLPGAIIWHMAWSKDDDAIDWQAYFHLRNLVVAAMHWDG- 428  
 Mav 365 WDDAEYGLRAGEHGYPVTLPGAIIWHMAWSKDDDAIDWQAYFHLRNLVVAALHWDG- 422  
 Map 368 WDDAEYGLRAGEHGYPVTLPGAIIWHMAWSKDDDAIDWQAYFHLRNLVVAALHWDG- 425  
 Mj1 381 WDDAEYGLRAAEQGYPTATMPGTAIWHMAWSKDDDAIDWQAYFHLRNLVVAALHWDG- 438  
 Mmc 381 WDDAEYGLRAAEQGYPTATMPGTAIWHMAWSKDDDAIDWQAYFHLRNLVVAALHWDG- 438  
 Mva 391 WDDADYGLRAGEHGYPVTLPGAIIWHMAWSKDDDAIDWQAYFHLRNLVVAALHWDG- 448  
 Mgi 384 WDDAEYGLRAGEHGYPVTLPGAIIWHMAWSKDDDAIDWQAYFHLRNLVVAALHWDG- 441  
 Msm 382 WDDAEYGLRAGEHGYPVTLPGAIIWHMAWSKDDDAIDWQAYFHLRNLVVAALHWDG- 439  
 Mab 382 WDDAEYGLRANEHGYPVTLPGAIIWHMAWSKDDDAIDWQAYFHLRNLVVAALHWDN- 439  
 Rr2 381 WDDAEYGLRARDAGYPTVTPGAAIWHMAWSKDDDAIDWQAYFHLRNLVVAALHMPG- 438  
 Nf2 380 WDDVEYGLRAREAGFPTVSLPGAAVWHMAWSKDDDAIDWQAYFHLRNLVVAALHLPG- 437  
 Cur 418 WDDGEFGLRAKDAGFPTASWPGIAIWHMAWSKDDDAIDWQAYFHLRNLIVAAIQHDG- 475  
 Cje 445 WDDGEFGLRAKDAGFPTASWPGIAIWHMAWSKDDDAIDWQAYFHLRNLIVAAIQHDG- 502  
 Cg1 403 WDDAEYGLRARKAGFPTATWPGIAIWHMAWSKDDDAIDWQAYFHLRNLVVAAMYHQG- 460  
 Cg2 406 WDDAEYGLRARKAGFPTATWPGIAIWHMAWSKDDDAIDWQAYFHLRNLVVAAMYHQG- 463  
 Cg3 396 WDDAEYGLRARKAGFPTATWPGIAIWHMAWSKDDDAIDWQAYFHLRNLVVAAMYHQG- 453  
 Cgr 396 WDDAEYGLRARKAGFPTATWPGIAIWHMAWSKDDDAIDWQAYFHLRNLVVAAMYHQG- 453  
 Cef 438 WDDAEYGLRAGAAGFPTATWPGIAIWHMAWSKDDDAIDWQAYFHLRNLIVAAAMNHDG- 495  
 Cdi 395 WDDAEYGLRAGNAGFATATWPGVAIWHLAWSDKDDAIDWQAYFHLRNLIVGAIE-NG- 451  
 Sel 395 WDDVEYGLRAGAAGFPTVTVPGIAVWHMSFADKHDLSLWQYFHLTRNQLVVAALHGPP- 452  
 Se2 392 WDDAEYSLRAGGHGYPTVTLPGAIIWHMPWTDKNDATDWTAYFHTRNRLILAALHSPDE 450  
 Rsa 397 WDDAEYGLRAKQHGATVSLPGAIVHVSVIDKDDLGVGQAYFHTRNRLITALLHSPYE 455  
 Afb 403 WDDSEYGLRAKAGFPTVSLPGSAVHVSVIDKDDLGVGQAYFHARNRVIAALLHSPYE 461  
 Aau 402 WDDAEYSLRGAAGFPTVTLPGAIVHVSVIDKDDSDVDWQAYYHERNRLIATLLHSPFP 460  
 Kra 400 WDDAEYGLRAMEHGYSTVSLPGACVHVSVIDKDDTIDWQAYYHERNRLVALLHSPYE 458  
 Krh 368 WDDAEYGLRAKQAGYSTVSLPGVAVWHMPWTEKDDTIDWQAYYHARNRWLAALLHSPYS 426  
 Njs 396 WDDSEYGLRAKEAGYPTVTFPGAIVHVPWTDKNDGLDWQAYFHQRNRFVAALLHSPYP 454  
 Cms 401 WDDAEYALRAKEGVPTVTLPGAIVHVSVIDKDDSDQDWQAFFHARNRLIAALLHSPYE 459  
 Cmm 401 WDDAEYALRAKEGVPTVTLPGAIVHVSVIDKDDSDQDWQAFFHARNRLIAALLHSPYE 459  
 Bl2 380 NDDVEYGVRAQRAGYRTVTVPGVCLWHQSFVDDKDDQLDWQAYYHIRNRTIMGLLYANQQ 438  
 Sen 338 GDDLLFGYMHKKH--NIVTLNGVASWQMDFER--KISVLNSYLNFRVAVPALISKRK- 391  
 Seh 338 GDDLLFGYMHKKH--NIVTLNGVASWQMDFER--KISVLNSYLNFRVAVPALISKRK- 391  
 Sew 338 GDDLLFGYMHKKH--NIVTLNGVASWQMDFER--KISVLNSYLNFRVAVPALISKRK- 391  
 Sep 338 GDDLLFGYMHKKH--NIVTLNGVASWQMDFER--KISVLNSYLNFRVAVPALISKRK- 391  
 Ses 338 GDDLLFGYMHKKH--NIVTLNGVASWQMDFER--KISVLNSYLNFRVAVPALISKRK- 391  
 Sev 338 GDDLLFGYMHKKH--NIVTLNGVASWQMDFER--KISVLNSYLNFRVAVPALISKRK- 391  
 Sej 338 GDDLLFGYMHKKH--NIVTLNGVASWQMDFER--KISVLNSYLNFRVAVPALISKRK- 391  
 Rba 335 GDDIEYGCRMAANGVETICLPGVAVWHESFHKK--TSDWLTYYDMRNRLFVASLYPQLV 391  
 Gox 298 GDDAEYGLRLKRAGFPTVMWPGVYVAHPNLQN--QTRPWHHYDRRNALICALLERGAV 354

**Figure S2.** DDA motif is conserved among GlfT2 variants. Sequences are labeled according to Table S1, and the label for GlfT2 is in red. The Asp residues in the DDA motif (Asp371–Ala373 for GlfT2) are invariant among these homologs, and nearby residues are conserved. This alignment is colored using ClustalW2 coloring to indicate conservation.



```

Glft2 160 -----
2z86A 111 PLDWPSDLTL PPLPESTNDY VWAGKRKELL II--DGLSIV IPTYNRAKIL

Glft2 176 VNALRELTA -PLVDQVIGA VIVPDQGERK VRDHPDFPAA AARLGSRLSI
2z86A 166 AITLACL CNQ KTIYD---YE VIVADDGSK- --EN--IEEI VREFESLLNI

Glft2 225 HDQPNLGGSG GYSRVMYEAL KNTDCQQILF MDDDIRLEPD SILRVLAMHR
2z86A 208 KYVRQKDYGY QLCAVRNLGL RAAKYNVVAI LDCDMPNPL WVQSYMELLA

Glft2 275 FAKAPMLVGG QMLNLQE-PS HLHIMGEVVD RSIFMWTAAP HAEYDHDFAE
2z86A 258 VDDNVALIGP RKYIDTSKHT Y----LDFLS QKSLINEIPE SV--DWRIEH

Glft2 324 YPLNDNNSRS KLLHRRIDVD YNGWWTMIP RQVAEELGQP LPLFIKWDDA
2z86A 317 FKN-TDN--- -LRLCNTPFR FFSGGNVAFA KKWLFRAGWF DEEFTHWGGE

Glft2 374 --DYGLRAAE HGYPTVTLPG AAIWHMA--- -----
2z86A 362 DNEFGYRLYR EGCYFRSVEG AMAYHQEPPQ LLQQKVPYFY RKKEKIESAT

```

**Figure S3.** Alignment used for homology model of Glft2. This alignment was generated by the SWISS-MODEL server and used as the basis for the homology model shown in Figure 3B. This region of the Glft2 sequence corresponds to its GT2 domain. The DDD and DDA motifs in Glft2 are highlighted in red. This alignment showed 14.8% identity between the two sequences with an e-value of  $3.6 \times 10^{-9}$ .

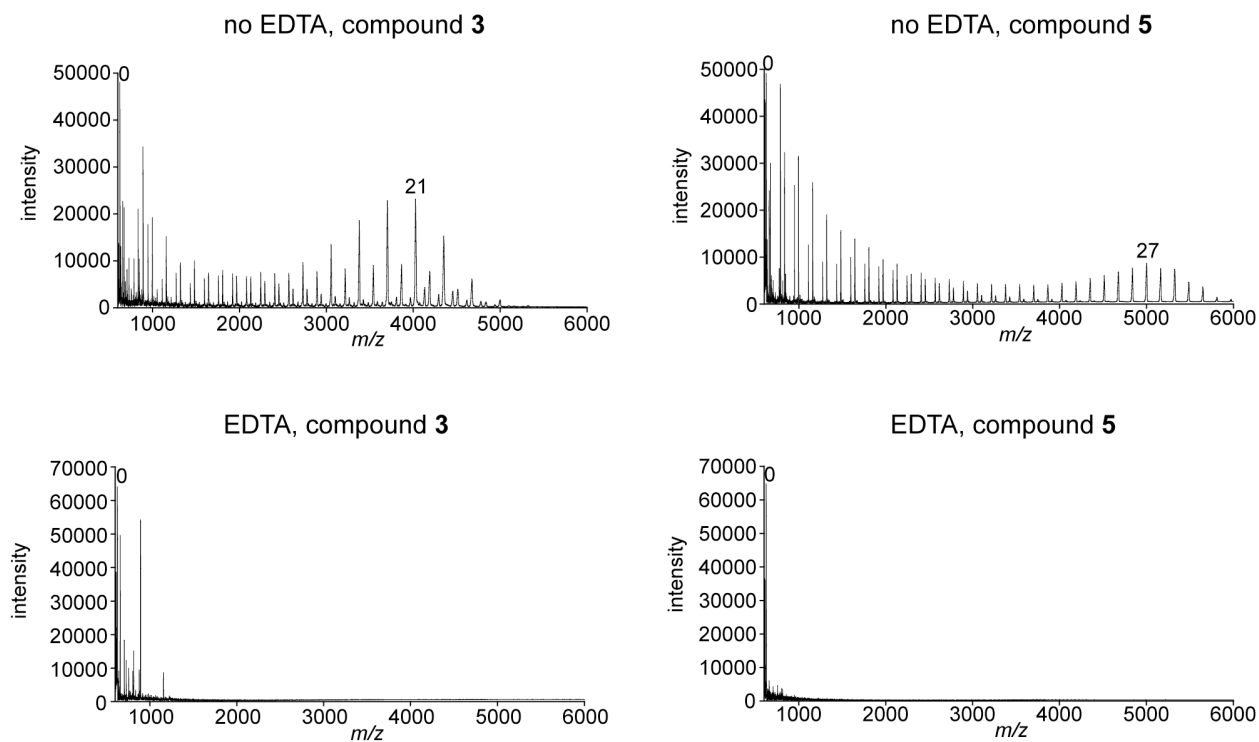

**Figure S4.** GlfT2 catalysis is metal-dependent. Spectra from MALDI-TOF MS analysis of GlfT2 reactions are shown. Products corresponding to addition of  $n$  Gal $f$  residues to compound **3** (left) or compound **5** (right) are observed from reactions of GlfT2, acceptor, and UDP-Gal $f$  only when metal ( $Mg^{2+}$ ; “no EDTA”) is present. In the presence of EDTA and absence of added metal, no products are observed from reactions with either acceptor (bottom spectra).

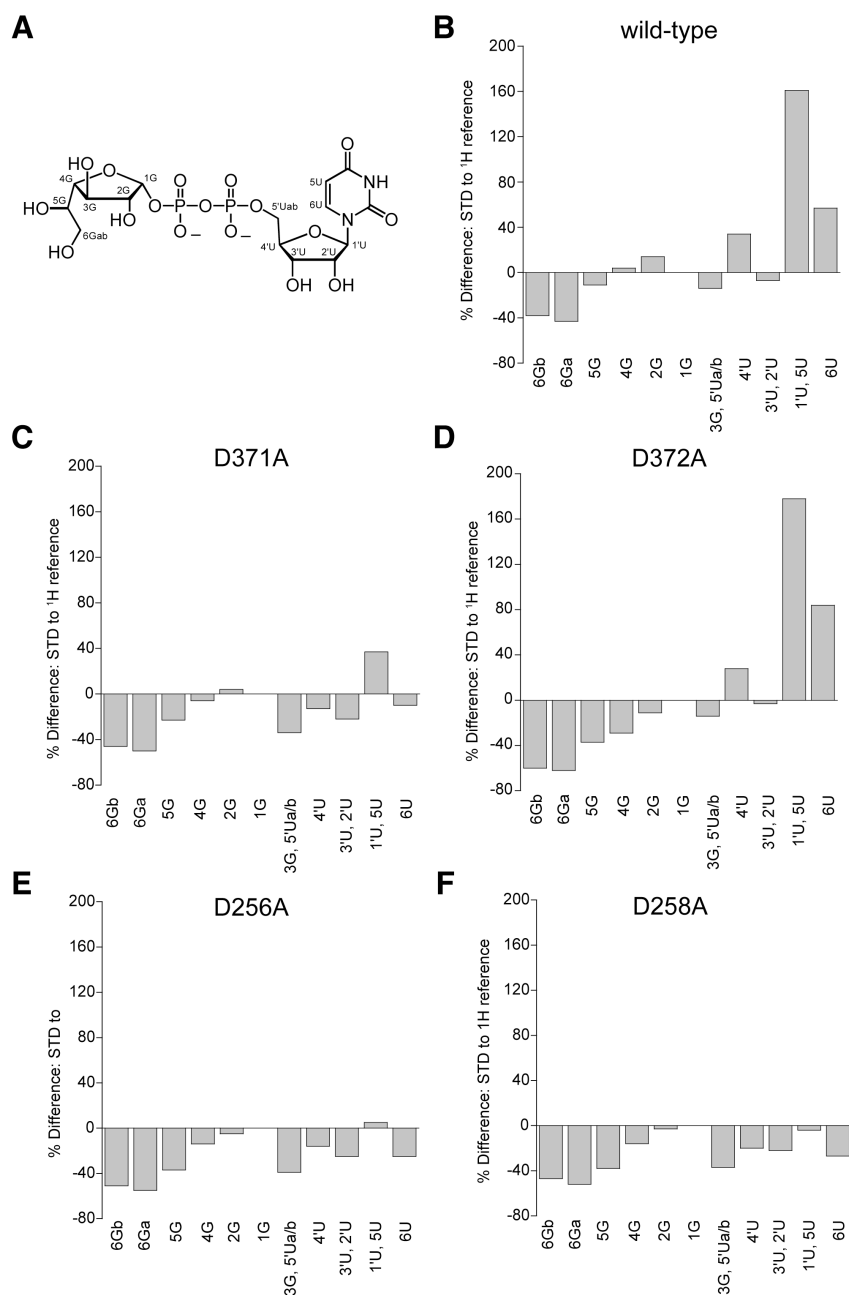

**Figure S5.** Analysis of STD NMR spectra for GlfT2 variants binding to UDP-Galf. Addition of wild-type GlfT2 (B), D371A GlfT2 (C), D372A GlfT2 (D), D256A GlfT2 (E), or D258A GlfT2 (F) to a solution containing UDP-Galf results in saturation transfer difference NMR signals at the indicated protons in the UDP-Galf ligand (A). The signal for each distinct proton is plotted to give an STD NMR profile. Comparison of STD NMR profiles for the variants indicates that D372A and wild-type GlfT2 bind UDP-Galf in a similar manner, D256A and D258A bind UDP-Galf similarly to each other but distinctly from wild-type GlfT2, and D371A binds UDP-Galf in a manner distinct from wild-type GlfT2.

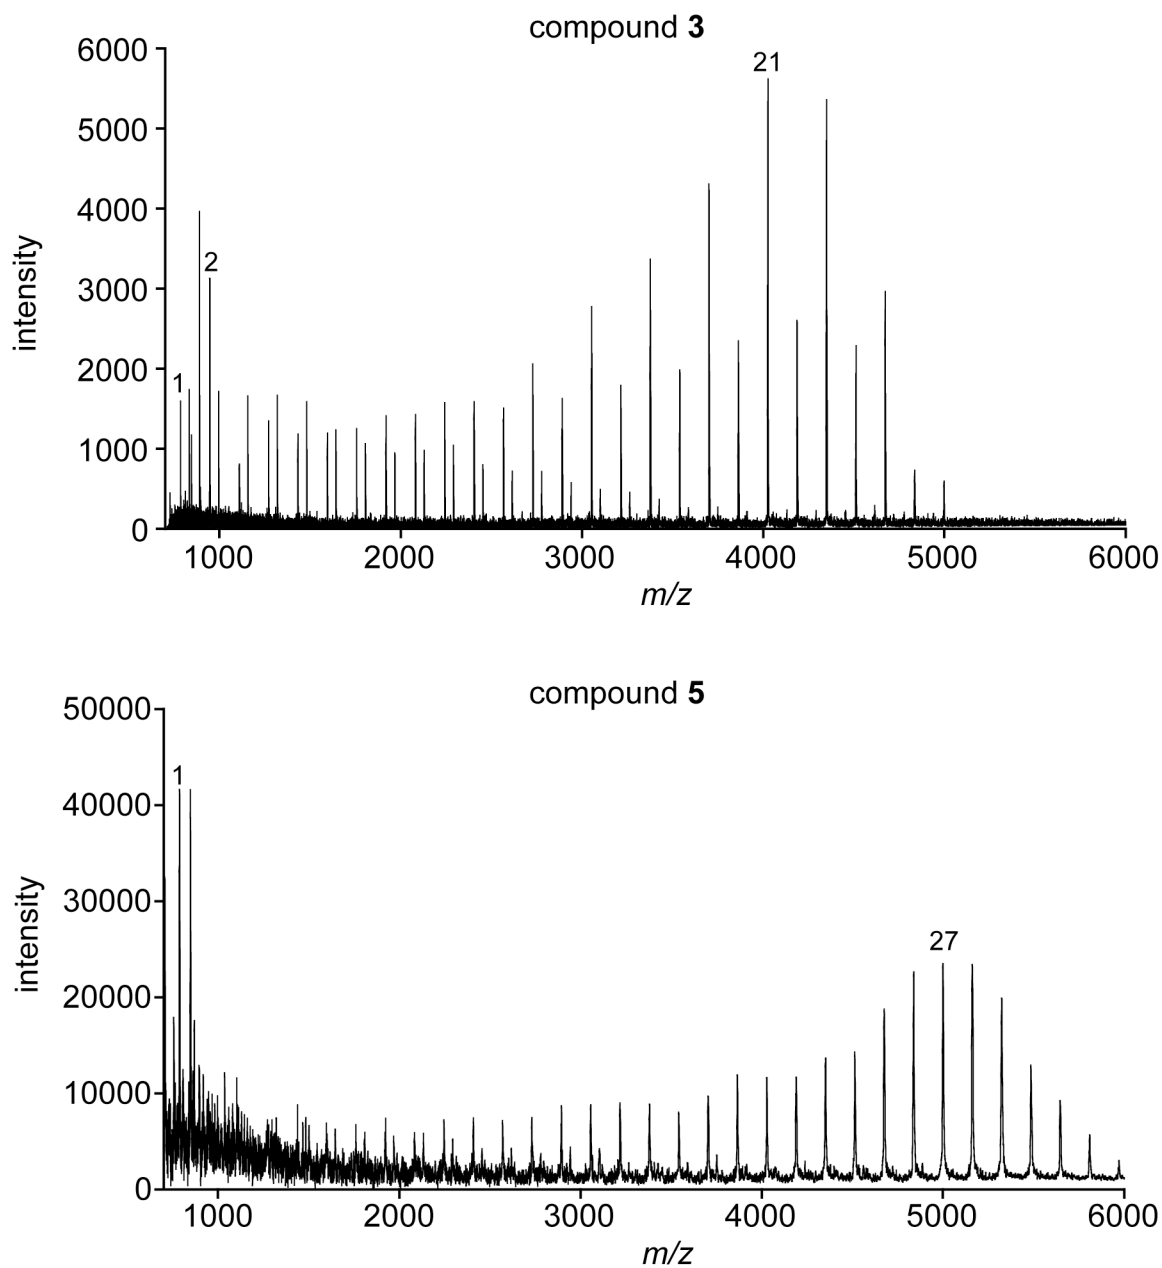

**Figure S6.** GlfT2 D371E variant shows wild-type polymerization activity. Spectra from MALDI-TOF MS analysis of 20 h incubations of GlfT2 D371E with either compound **3** (top) or compound **5** (bottom) show polymeric products. To orient these spectra with those shown in Figure 5, certain peaks that correspond to  $[M+Na]^+$ , where M equals the mass of the acceptor plus  $n$  GalF residues, are labeled with the appropriate value of  $n$ . Labels are shown only for the short products ( $n = 1, 2$ ) and for the highest-intensity peak of the polymeric products ( $n = 21, 27$ ).



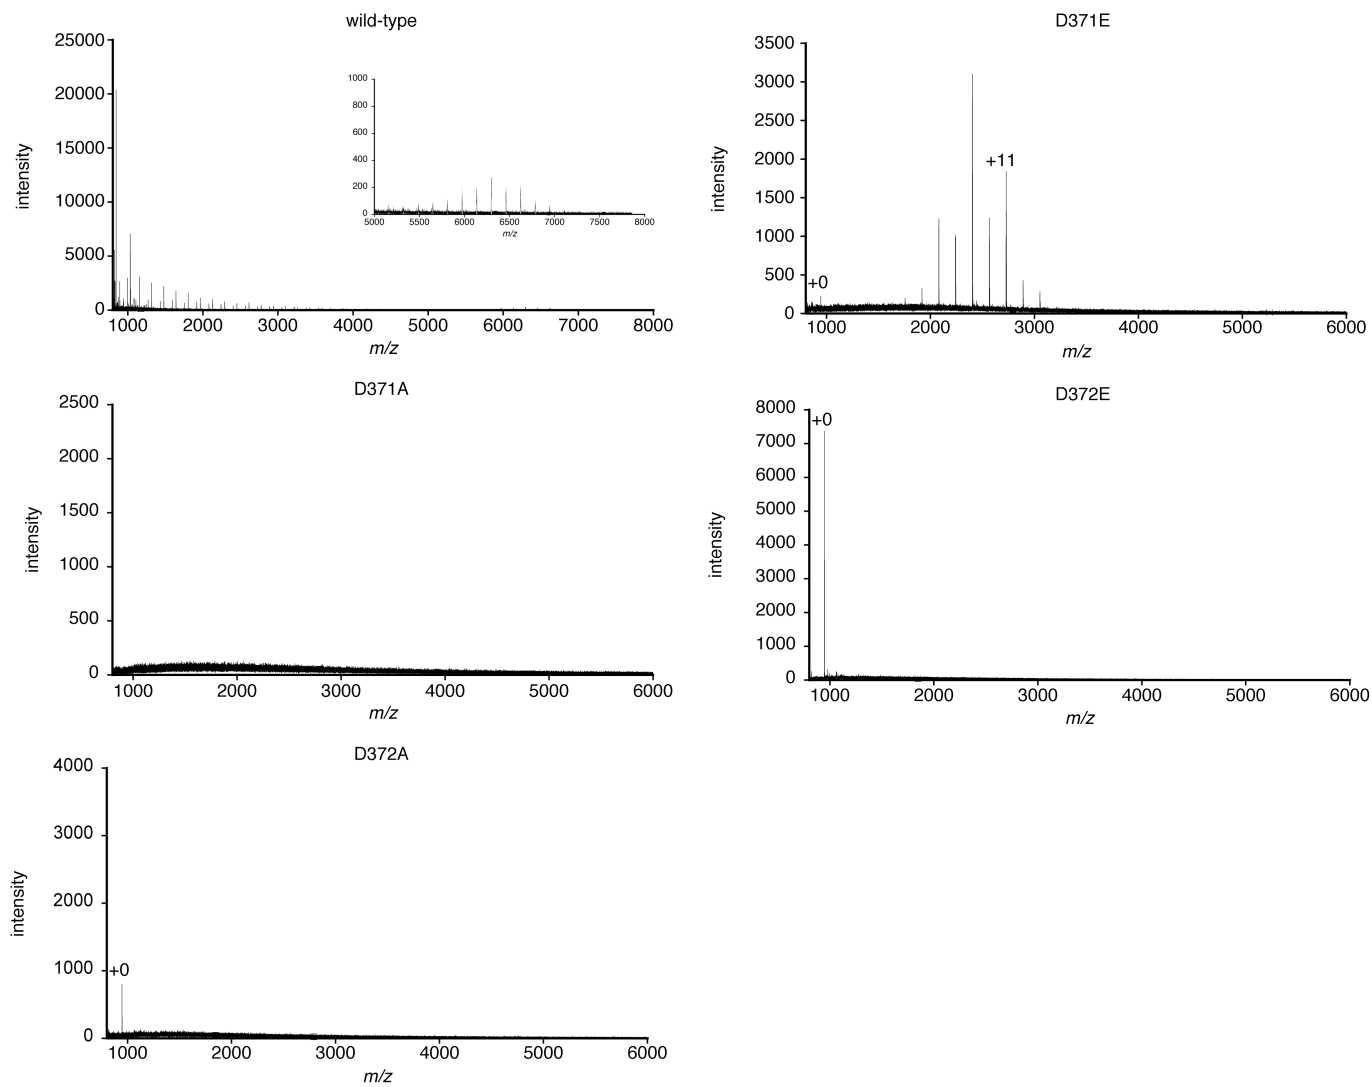

**Figure S7.** GlfT2 DDA motif variants show impaired activity with tetrasaccharide acceptor substrate. GlfT2 D371A, D372A, and D372E do not promote addition of Gal $\beta$  residues to a tetrasaccharide acceptor that is elongated by wild-type GlfT2 (up to +37 Gal $\beta$  residues) or D371E GlfT2 (up to +17 Gal $\beta$  residues).

**A**

```

SpHasA  41  -----KVA AV  IPSYNEDAES  LLET LKSVLA  QTYPLSEIYI  VDDGSSNTDA
3bcvB   3  LIP--KVSVI  VPIYNVE-KY  LDQC VQALLA  QTLSDIEIIL  IDDESP-DNC

SpHasA  86  IQLIEEYVNR  EVDICRNVIV  HRSLV NKGKR  HAQAWAFERS  DADVFLTVDS
3bcvB   49  PKICDDYAAQ  YPN-----IK  VIHKKNAGLG  XACNSGLDVA  TGEYVAFCD S

SpHasA  136  DTYYIPNALE  ELLKSFNDET  VYAATGHLNA  RNRQTNLLTR  LTDIRYDNAF
3bcvB   94  DDYVDSXYYX  TXYNVAQKYT  CDAVFTFKLY  KNKNEI-HTL  LKDLIASDPY

SpHasA  186  GVERAAQSLT  GNILVCSGPL  SIYRREVIIP  NLERYKNQTF  LGLPVSIGDD
3bcvB  163  AREE-----  -RAIQVSAKV  VLYRRNLIEK  KHLRFVSER-  ----ILPSED

SpHasA  236  RCLTNYAIDL  GRTVY  --
3bcvB  201  LIFNVDVLAN  SNIVCVLP

```

**B**

```

CesA    145  -----PDE  WPTVDIFVPT  YNEELSIVRL  TVLGSLGIDW
1xhbA   95  NRSLPDVRL E  GCKTKVYPDN  LPTTSVVIVF  HNEAWSTLLR  TVHSVINRSP

CesA    178  PPEKVRVHIL  DDGRRPE-FA  AFAAECG---  ---ANYIARP  TNEHAKAGNL
1xhbA  145  RHMIEEIVLV  DDASERDFLK  RPLESYVKKL  KVPVHVIRME  QRS-GLIRAR

CesA    221  NYAIGHTDGD  YILIFDCDHV  PTRAFLQLTM  GWMVEDPKIA  LMQTPHHFYS
1xhbA  194  LKGA AVSRGQ  VITFLDAHCE  CTAGWLEPLL  ARIKHDRRTV  VCP II-DVIS

CesA    271  PDPFQRNLSA  GYR-----  -----TPPE  GNLFYGVVQD  GND FWDATFF
1xhbA  243  DDTFEYMAGS  DMTYGGFNWK  LNFRWYPVPQ  REMDRR-KGD  RTL PVRTPTM

CesA    308  CGSCAILRRT  AIEQIGGFAT  QTV---TEDA  HTALKMQRLG  WSTAYL ---
1xhbA  292  AGGLFSIDRD  YFQEIGTYDA  GMDIWGGENL  EISFRIWQCG  GTLEIVTCSH

```

**Figure S8.** Sequence alignments used for homology modeling of other GT-2 glycosyltransferases. (A) Alignment of hyaluronan synthase from *Streptococcus pyogenes* (SpHasA; GenBank accession number AAA17984.1) with the sequence of a glycosyltransferase PDB ID: 3BCV. This alignment, generated automatically by SWISS-MODEL, was used for the subsequent homology model of SpHasA, which showed 18.6% identity between the two sequences and gave an e-value of  $1.3 \times 10^{-14}$ . (B) Alignment of cellulose synthase from *Gluconacetobacter xylinus* (CesA; GenBank accession number P21877.3) with the glycosyltransferase UDP-GalNAc:polypeptide  $\alpha$ -N-acetylgalactosaminyltransferase-T1 (PDB ID: 1XHB). This alignment was generated automatically in SWISS-MODEL and was used for subsequent homology modeling. This alignment showed 13.1% sequence identity between the two sequences with an e-value of  $1.6 \times 10^{-11}$ .

**Table S2.** Oligonucleotide primers used for site-directed mutagenesis. For each desired mutation, the primer indicated in the table and its reverse complement (not shown) were used together in the PCR mixture.

|             |                                                             |
|-------------|-------------------------------------------------------------|
| Gift2 D256A | 5' – CAGATCCTATTCATGG <u>CCG</u> GACGACATCCGCCTC – 3'       |
| Gift2 D256E | 5' – CAGATCCTATTCATGG <u>GAG</u> GACGACATCCGCCTC – 3'       |
| Gift2 D258A | 5' – CTATTCATGGACGACG <u>CC</u> ATCCGCCTCGAGCCG – 3'        |
| Gift2 D258E | 5' – CTATTCATGGACGACG <u>AG</u> ATCCGCCTCGAGCCG – 3'        |
| Gift2 D371A | 5' – GCCGTTGTTTCATCAAATGGG <u>CCG</u> GACGCCGATTACGGCC – 3' |
| Gift2 D371E | 5' – GCCGTTGTTTCATCAAATGGG <u>AAG</u> GACGCCGATTACGGCC – 3' |
| Gift2 D372A | 5' – GCCGTTGTTTCATCAAATGGGACG <u>CCG</u> CCGATTACGGCC – 3'  |
| Gift2 D372E | 5' – GCCGTTGTTTCATCAAATGGGACG <u>AAG</u> CCGATTACGGCC – 3'  |
